# Supplementary material for: Cross-linked polymers of diethynylbenzene and phenylacetylene as new polymer precursors for high-yield synthesis of high-performance nanoporous activated carbons for supercapacitors, hydrogen storage, and CO2capture
Source: Royal Society of Chemistry journal article supplement (doi:10.1039/c4ta04038d), 2014-10-22
Supplement: c4ta04038d1.pdf [file c4ta04038d1.pdf]

**Supporting Information**

for

**Cross-Linked Polymers of Diethynylbenzene and Phenylacetylene as New Polymer  
Precursors for High-Yield Synthesis of High-Performance Nanoporous Activated Carbons  
for Supercapacitors, Hydrogen Storage, and CO<sub>2</sub> Capture**

Mark Grundy<sup>1</sup> and Zhibin Ye<sup>1,2,\*</sup>

<sup>1</sup> Bharti School of Engineering, Laurentian University, Sudbury, Ontario P3E 2C6, Canada

<sup>2</sup> Department of Chemistry and Biochemistry, Laurentian University, Sudbury, Ontario P3E 2C6, Canada

\* Corresponding author. Email: [zye@laurentian.ca](mailto:zye@laurentian.ca); Fax: 1(705) 675-4862

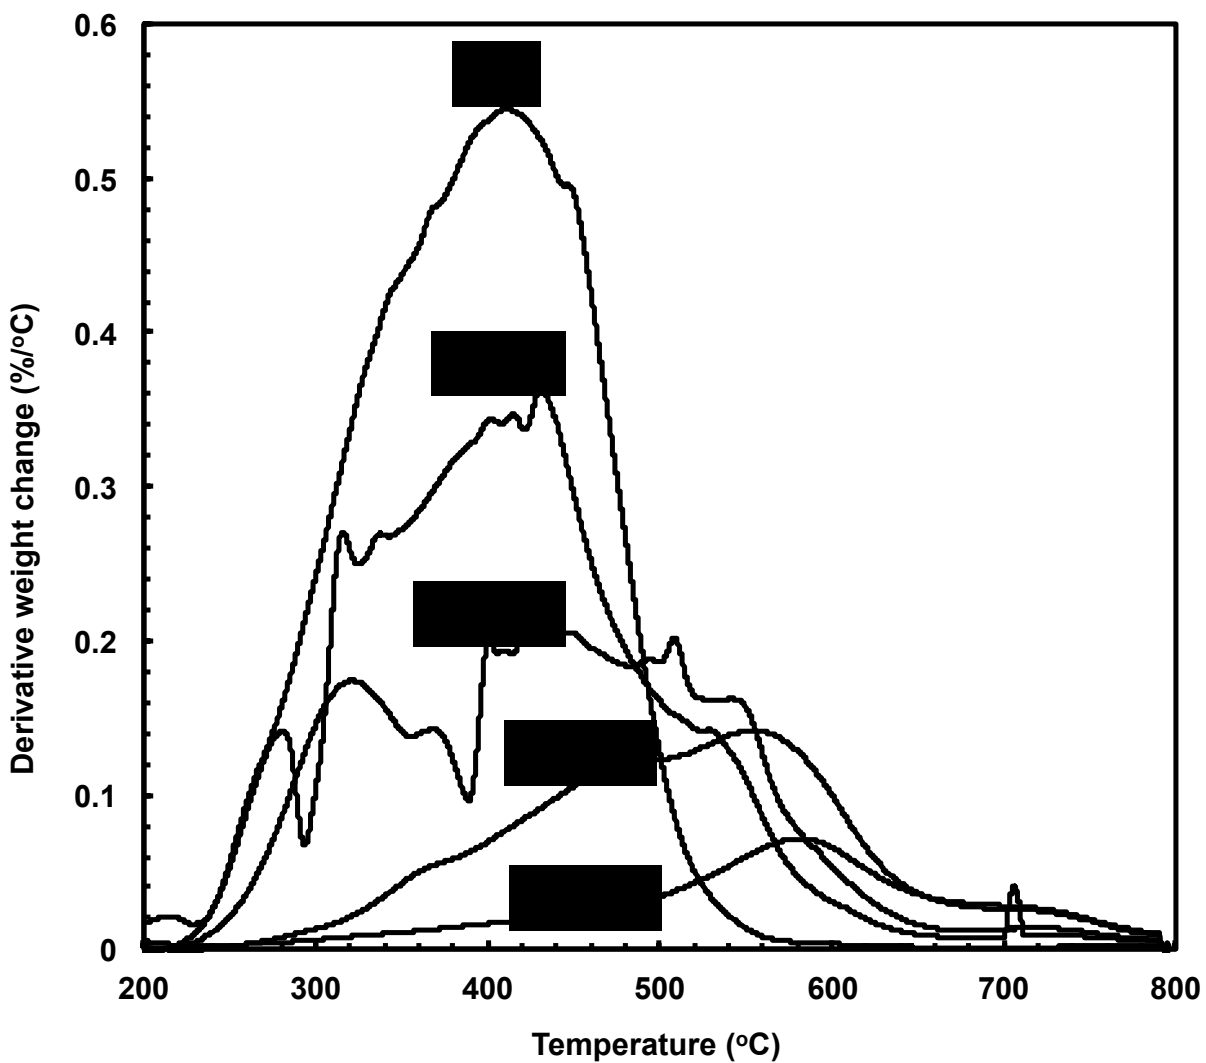

Figure S1. First-order derivative TGA curves of representative polymers (corresponding to the TGA curves in Figure 1).

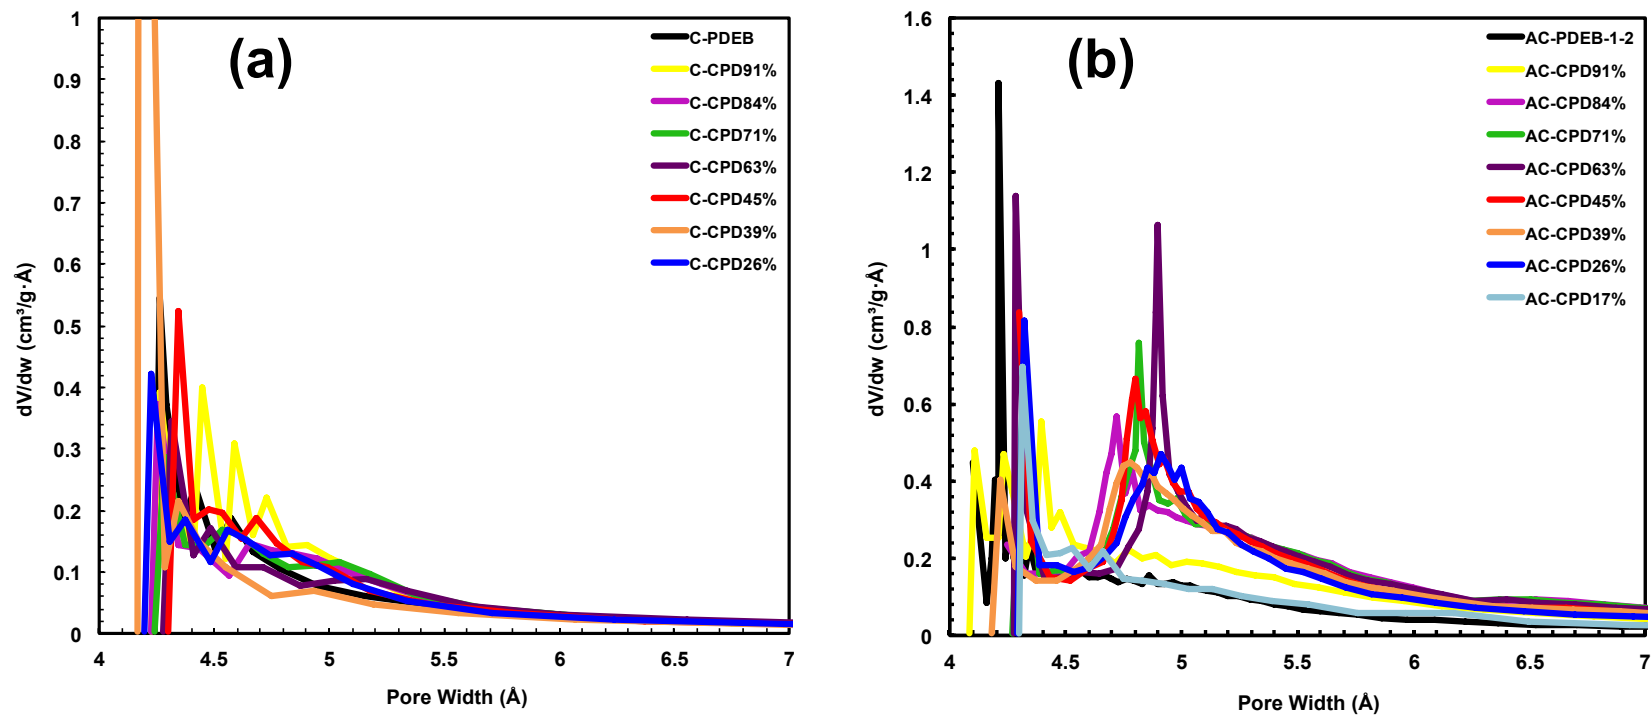

Figure S2. Micropore size distribution curves of (a) the nonactivated carbons and (b) activated carbons determined from N<sub>2</sub> sorption isotherm ( $P/P_0 < 0.02$ ) with the HK model.

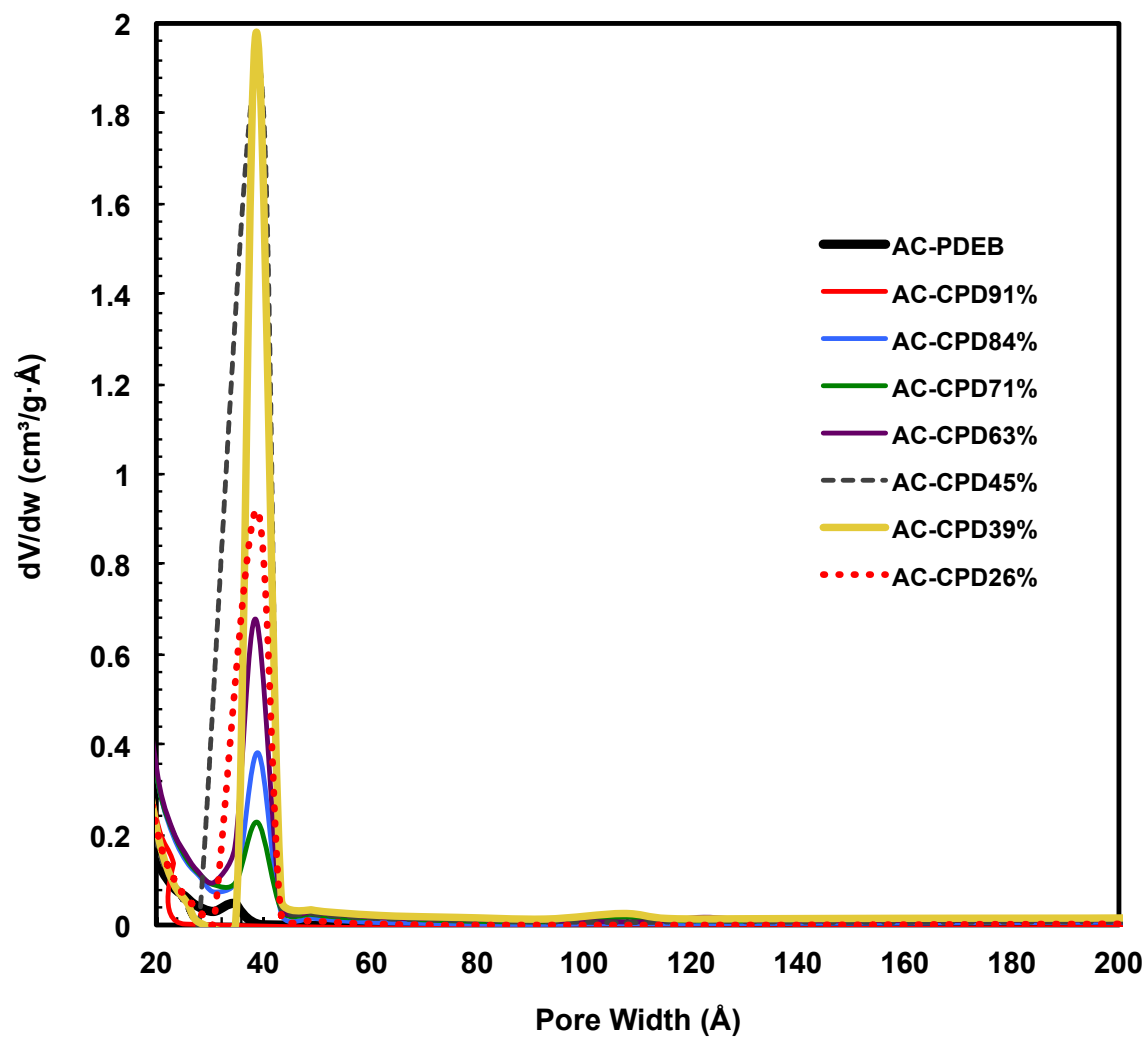

Figure S3. Mesopore size distribution of the activated carbons determined from  $\text{N}_2$  desorption data with BJH model.

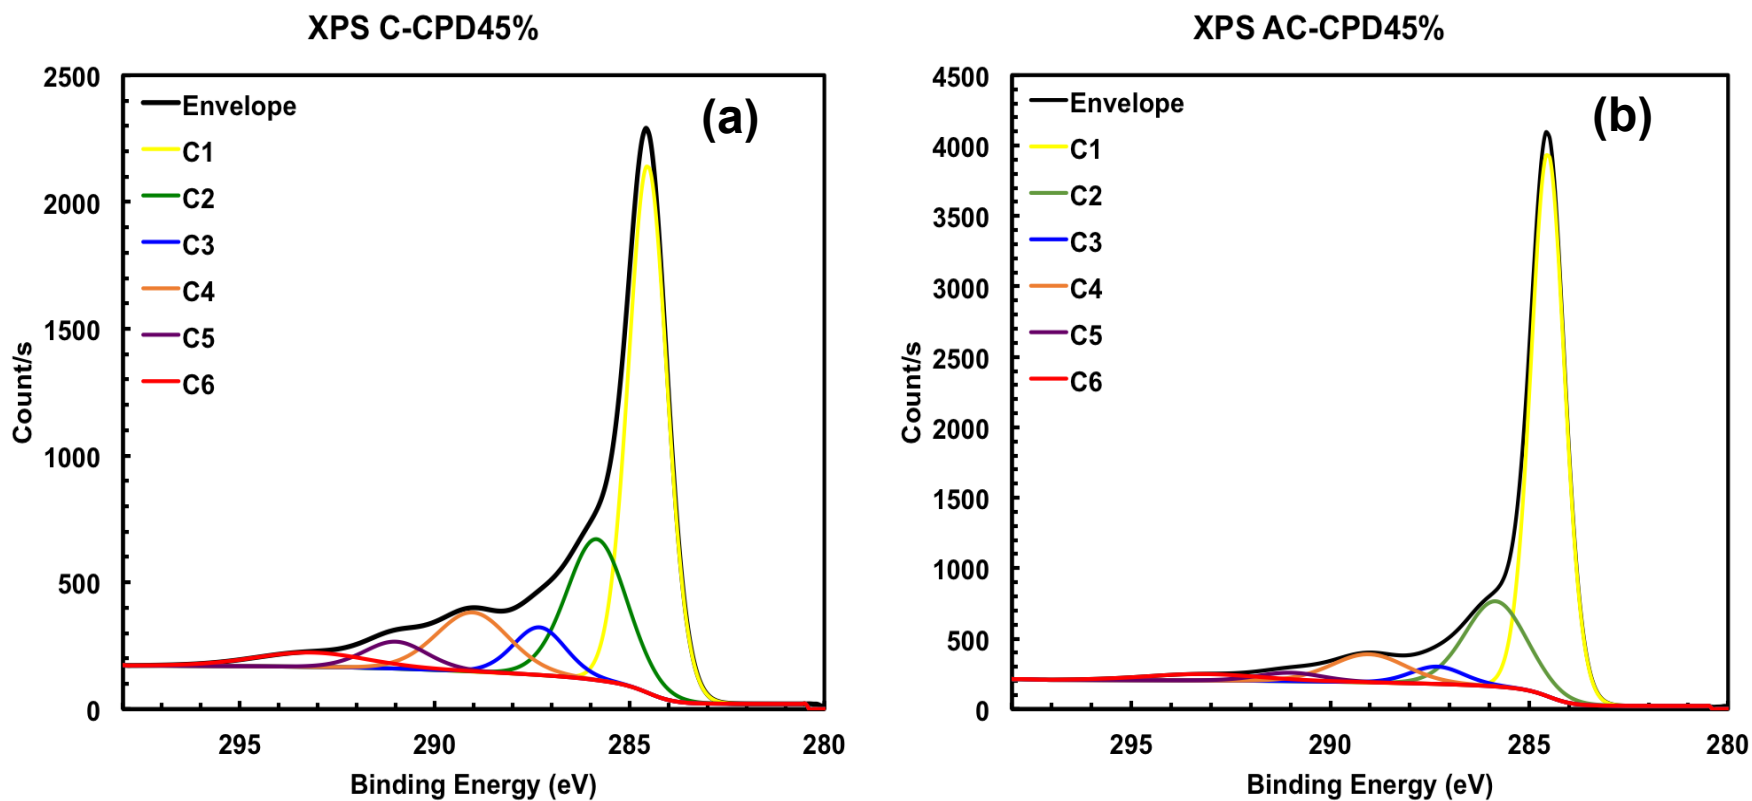

Figure S4. C 1s XPS spectra of (a) C-CPD45% and (b) AC-CPD45%. Peaks labeled as C1–C4 (binding energy at 284.53, 285.84, 287.31, 289.03 eV, respectively) arise, respectively, from the  $sp^3$  C–C and  $sp^2$  C=C, C–OH, C=O, O–C=O functional groups. Peaks C5 (291.01 eV) and C6 (293.19 eV) are satellite peaks resulting from  $\pi$ - $\pi^*$  electronic transition (see Ref. 13 and 15d in the article). The atomic content of C1–C6 in C-CPD45% is 65.8%, 18.8%, 3.3%, 7.5%, 1.9%, and 2.6%, respectively; and the corresponding content in AC-CPD45% is 52.4%, 21.8%, 6.4%, 11.0%, 4.3%, and 4.1%, respectively.

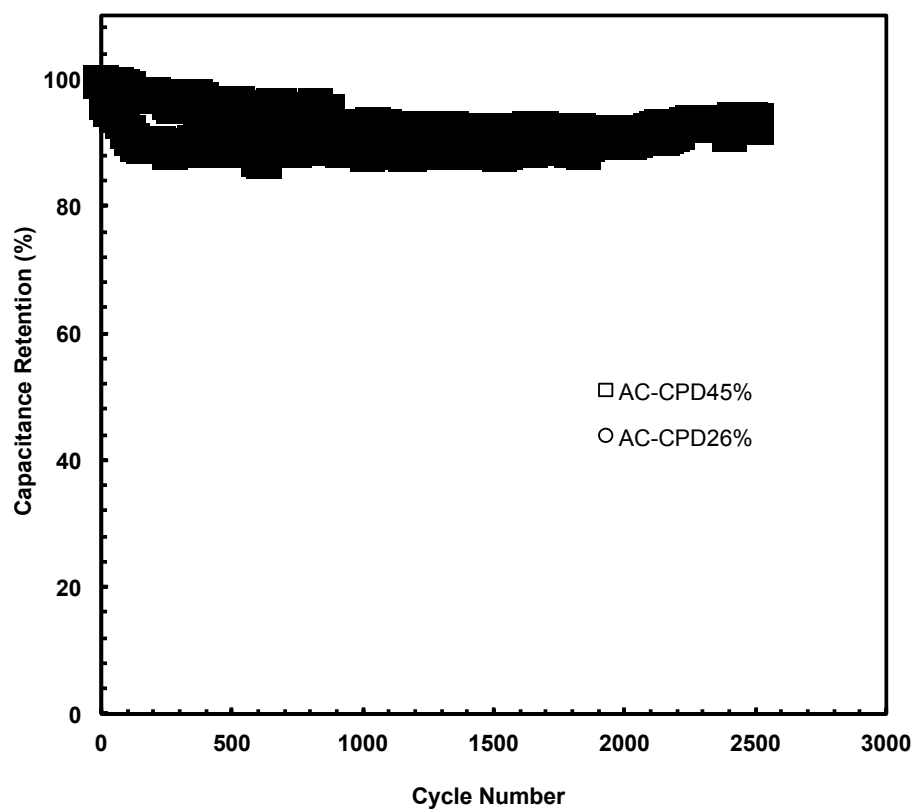

Figure S5. Cyclic stability of electrodes made with AC-CPD45% and AC-CPD26%, respectively, at the current density of 1 A/g over 2500 charge-discharge cycles. The tests were performed on three-electrode cells in 1 M H<sub>2</sub>SO<sub>4</sub> solution.

**Table S1. Specific capacitance results reported in the literature for representative carbon-based materials in 3-electrode cells.**

| Name                                                    | Electrolyte                        | Potential Range         | CV Measurement           |                                    | GCD Measurement               |                                    | Gas Sorption Measurement                   |                                                                                |                                                                 |                                                                |                                   | Reference |
|---------------------------------------------------------|------------------------------------|-------------------------|--------------------------|------------------------------------|-------------------------------|------------------------------------|--------------------------------------------|--------------------------------------------------------------------------------|-----------------------------------------------------------------|----------------------------------------------------------------|-----------------------------------|-----------|
|                                                         |                                    |                         | Scan rate<br><i>mV/s</i> | Specific Capacitance<br><i>F/g</i> | Current Density<br><i>A/g</i> | Specific Capacitance<br><i>F/g</i> | BET Surface Area<br><i>m<sup>2</sup>/g</i> | Pore Volume<br><i>V<sub>total</sub> (V<sub>mic</sub>)<br/>cm<sup>3</sup>/g</i> | Pore Size<br><i>d<sub>micro</sub> (d<sub>meso</sub>)<br/>nm</i> | CO <sub>2</sub> Adsorption<br><i>mmol/g (cm<sup>3</sup>/g)</i> | Hydrogen adsorption<br><i>wt%</i> |           |
| <b>Carbon Microspheres</b>                              |                                    |                         |                          |                                    |                               |                                    |                                            |                                                                                |                                                                 |                                                                |                                   |           |
| USP-C2                                                  | 1M H <sub>2</sub> SO <sub>4</sub>  | 0 to 0.9 V (Ag/AgCl)    | 5                        | 360 ± 11                           | --                            | --                                 | 698                                        | --                                                                             | 0.82                                                            | --                                                             | --                                | S1        |
| <b>Activated Carbon</b>                                 |                                    |                         |                          |                                    |                               |                                    |                                            |                                                                                |                                                                 |                                                                |                                   |           |
| PIR-4                                                   | 6M KOH                             | -0.9 to 0 V (Ag/AgCl)   | 5                        | 258                                | --                            | --                                 | 2350                                       | 0.88(0.44)                                                                     | (2.25)                                                          | --                                                             | --                                | S2        |
| AKN                                                     | 1M H <sub>2</sub> SO <sub>4</sub>  | 0 to 0.75 V (Ag/AgCl)   | 0.5                      | 358                                | 0.125(1)                      | 355(329)                           | 2062                                       | 1.99(0.95)                                                                     | 1.4                                                             | (0.37)                                                         | --                                | S3        |
| AK                                                      | 1M H <sub>2</sub> SO <sub>4</sub>  | 0 to 0.75 V (Ag/AgCl)   | 0.5                      | 321                                | 0.125(1)                      | 325(291)                           | 2132                                       | 2.18(0.96)                                                                     | 1.4                                                             | (0.44)                                                         | --                                | S3        |
| N22AC                                                   | 1M H <sub>2</sub> SO <sub>4</sub>  | 0 to 1 V (Ag/AgCl)      | 10                       | 426                                | --                            | --                                 | 2204                                       | 1.17(0.69)                                                                     | (2.12)                                                          | --                                                             | --                                | S4        |
| RAC                                                     | 1M H <sub>2</sub> SO <sub>4</sub>  | 0 to 1 V (Ag/AgCl)      | 10                       | 241                                | --                            | --                                 | 1913                                       | 0.86(0.51)                                                                     | 1.79                                                            | --                                                             | --                                | S4        |
|                                                         | 0.5M                               |                         |                          |                                    |                               |                                    | ~2000graph                                 | ~1.1(~0.95)                                                                    | --                                                              | --                                                             | --                                |           |
| CobK3                                                   | H <sub>2</sub> SO <sub>4</sub>     | -0.1 to 0.9 V (Ag/AgCl) | 25                       | 127                                | --                            | --                                 |                                            |                                                                                |                                                                 |                                                                |                                   | S5        |
| CNSs-6                                                  | 6M NaOH                            | -0.8 to 0.2 V (Hg/HgO)  | 5                        | 328                                | --                            | --                                 | ~1700calc                                  | ~0.86                                                                          | 2.00                                                            | --                                                             | --                                | S6        |
| KOH-500                                                 | 1M NaNO <sub>3</sub>               | -1.0 to 0.3 V (MSE).    | 5                        | 226                                | --                            | --                                 | --                                         | 1.375                                                                          | --                                                              | --                                                             | --                                | S7        |
| <b>Carbide-derived Carbon</b>                           |                                    |                         |                          |                                    |                               |                                    |                                            |                                                                                |                                                                 |                                                                |                                   |           |
| Nano-CDC                                                | 1M H <sub>2</sub> SO <sub>4</sub>  | 0.4 to 0.9 V (Ag/AgCl)  | --                       | --                                 | 0.0025 mA                     | 132                                | 952                                        | 0.90                                                                           | 0.85                                                            | --                                                             | --                                | S8        |
| CCDC-KOH                                                | 6M KOH                             | -1 to 0 V (Hg/HgO)      | 1                        | 280.1                              | --                            | --                                 | 1100                                       | 1.74(0.17)                                                                     | (8.83)                                                          | --                                                             | --                                | S9        |
| ACA-K2CO <sub>3</sub>                                   | 6M KOH                             | -1 to 0 V (Ag/AgCl)     | --                       | --                                 | 1                             | 152                                | 1166                                       | 1.71                                                                           | --                                                              | --                                                             | --                                | S10       |
| PCNFW                                                   | 6M KOH                             | -1 to 0 V (Hg/HgO)      | 5                        | 171                                | --                            | --                                 | 416                                        | 0.19(0.18)                                                                     | --                                                              | --                                                             | --                                | S11       |
| N-CNFs-900                                              | 6M KOH                             | -1 to 0 V (Hg/HgO)      | --                       | --                                 | 1                             | 202                                | 563                                        | 0.51                                                                           | (3.64)                                                          | --                                                             | --                                | S12       |
| <b>CNT in Activated Carbon</b>                          |                                    |                         |                          |                                    |                               |                                    |                                            |                                                                                |                                                                 |                                                                |                                   |           |
| tube-in-AC                                              | 6M KOH                             | 0 to 1 V (SCE)          | 1                        | 378                                | --                            | --                                 | 1626                                       | ~1 – 2                                                                         | --                                                              | --                                                             | --                                | S13       |
| <b>CO<sub>2</sub>-Derived Boron Doped Porous Carbon</b> |                                    |                         |                          |                                    |                               |                                    |                                            |                                                                                |                                                                 |                                                                |                                   |           |
| K-BPC                                                   | 1M Na <sub>2</sub> SO <sub>4</sub> | -0.4 to 0.6 (Ag/AgCl)   | 20                       | 139                                | --                            | --                                 | --                                         | --                                                                             | --                                                              | --                                                             | --                                | S14       |
| <b>Graphene</b>                                         |                                    |                         |                          |                                    |                               |                                    |                                            |                                                                                |                                                                 |                                                                |                                   |           |
| NGS                                                     | 6M KOH                             | -1.1 to -0.1 V (SCE)    | --                       | --                                 | 0.2                           | 326                                | 593                                        | 0.092                                                                          | 3                                                               | --                                                             | --                                | S15       |
| <b>Graphene in Activated Carbon</b>                     |                                    |                         |                          |                                    |                               |                                    |                                            |                                                                                |                                                                 |                                                                |                                   |           |
| GSNCs-1%                                                | 1M H <sub>2</sub> SO <sub>4</sub>  | -0.2 to 0.8 V (Ag/AgCl) | --                       | --                                 | 0.3                           | 324.6                              | 1256                                       |                                                                                | (2-50)                                                          | --                                                             | --                                | S16       |
| RG3                                                     | 2M H <sub>2</sub> SO <sub>4</sub>  | -0.2 to 0.8 V (Ag/AgCl) | --                       | --                                 | 1                             | 316                                | 1652                                       | 0.94(0.39)                                                                     | (2.28)                                                          | --                                                             | --                                | S17       |
| RG3                                                     | 6M KOH                             | -0.2 to 0.8 V (Ag/AgCl) | --                       | --                                 | 1                             | 397                                | 1652                                       | 0.94(0.39)                                                                     | (2.28)                                                          | --                                                             | --                                | S17       |
| P-F-GO-E                                                | 1M H <sub>2</sub> SO <sub>4</sub>  | 0 to 1 (Ag/AgCl)        | --                       | --                                 | 1                             | 327                                | 181.6                                      | 0.74                                                                           | (<5)                                                            | --                                                             | --                                | S18       |
| <b>Hierarchical Porous Carbon</b>                       |                                    |                         |                          |                                    |                               |                                    |                                            |                                                                                |                                                                 |                                                                |                                   |           |
| THPC                                                    | 6M KOH                             | -1 to 0 (Hg/HgO)        | --                       | --                                 | 0.5                           | 318.2                              | 2870                                       | 2.19                                                                           | (2.73)                                                          | --                                                             | --                                | S19       |
| <b>Mesoporous Carbon by Soft-templating Approach</b>    |                                    |                         |                          |                                    |                               |                                    |                                            |                                                                                |                                                                 |                                                                |                                   |           |
| COU-2                                                   | 1M H <sub>2</sub> SO <sub>4</sub>  | -0.2 to 0.8 V (Ag/AgCl) | 2                        | 184                                | --                            | --                                 | 694                                        | 0.66(0.16)                                                                     | (5.5)                                                           | --                                                             | --                                | S20       |
| K-COU-2                                                 | 1M H <sub>2</sub> SO <sub>4</sub>  | -0.2 to 0.8 V (Ag/AgCl) | 2(20)                    | 244(187)                           | --                            | --                                 | 1685                                       | 1.25(0.47)                                                                     | (5.5)                                                           | --                                                             | --                                | S20       |

|                                                            |                                     |                          |       |          |        |          |         |              |                |      |      |     |
|------------------------------------------------------------|-------------------------------------|--------------------------|-------|----------|--------|----------|---------|--------------|----------------|------|------|-----|
| AMC-6                                                      | 0.1M NaCl                           | -0.4 to 0.6 V (Ag/AgCl)  | 1(10) | 188(32)  | --     | --       | 1940    | 1.57(0.62)   | (10)           | --   | --   | S21 |
| BP-800                                                     | 1M H <sub>2</sub> SO <sub>4</sub>   | -0.6 to 0.4 (Hg/HgO)     | 20    | 192      | --     | --       | 1578    | 1.092        | <2             | --   | --   | S22 |
| BP-800                                                     | 6M KOH                              | -1.2 to 0 V (Hg/HgO)     | 20    | 237      | --     | --       | 1578    | 1.092        | <2             | --   | --   | S22 |
| <b>MOF-derived Carbon</b>                                  |                                     |                          |       |          |        |          |         |              |                |      |      |     |
| NPC-800                                                    | 0.5M H <sub>2</sub> SO <sub>4</sub> | 0 to 0.8 V (Ag/Ag/Cl)    | 20    | 238      | --     | --       | 943     | 0.84         | 0.8(2-4)       | --   | --   | S23 |
| CZIF69a                                                    | 0.5M H <sub>2</sub> SO <sub>4</sub> | -0.241 to 0.759          | 20    | 156      | --     | --       | 2264    | --           | <1.3           | 4.76 | 2.16 | S24 |
| C-S700                                                     | 6M KOH                              | -1 to 0 V (Ag/AgCl)      | 2(20) | 182(163) | --     | --       | 817     | 0.85         | 0.8(2.7-10.6)  | --   | --   | S25 |
| Z-900                                                      | 0.5M H <sub>2</sub> SO <sub>4</sub> | -0.2 to 1 V (Ag/AgCl)    | 5     | 214      | --     | --       | 1075    | 0.57(0.38)   | (10.2)         | --   | --   | S26 |
| Z-900                                                      | 0.5M H <sub>2</sub> SO <sub>4</sub> | -0.2 to 1 V (Ag/Ag/Cl)   | 5(20) | 214(158) | --     | --       | 1075    | 0.57(0.38)   | (10.2)         | --   | --   | S26 |
| Carbon-700                                                 | 6M KOH                              | -1 to 0 V (SCE)          | 10    | 218      | --     | --       | 672     | 0.38(0.34)   | (2.3)          | --   | --   | S27 |
| MAC-A                                                      | 6M KOH                              | -1 to 0 V (Ag/AgCl)      | 2     | 271      | --     | --       | 2222    | 1.14(1.01)   | 0.68           | --   | --   | S28 |
| MC-A                                                       | 6M KOH                              | -1 to 0 V (Ag/AgCl)      | 2     | 208      | --     | --       | 1673    | 1.33(0.68)   | 0.9            | --   | --   | S28 |
| MPC-A                                                      | 6M KOH                              | -1 to 0 V (Ag/AgCl)      | 2     | 196      | --     | --       | 1271    | 1.92(0.59)   | 0.9            | --   | --   | S28 |
| <b>OMC-derived Carbon</b>                                  |                                     |                          |       |          |        |          |         |              |                |      |      |     |
| KF1- 90                                                    | 6M KOH                              | -0.8 to 0 V (Hg/HgO)     | --    | --       | 0.5    | 200      | 1410    | 0.73(0.38)   | 1.5-4          | --   | --   | S29 |
| KNOMC-850                                                  | 2M KOH                              | -1 to 0 V (SCE)          | --    | --       | 1      | 320      | 693     | 0.75(0.69)   | (3.27)         | --   | --   | S30 |
| <b>Surface Treated Carbon Black</b>                        |                                     |                          |       |          |        |          |         |              |                |      |      |     |
| BP2                                                        | 1M H <sub>2</sub> SO <sub>4</sub>   | -0.4 to 0.75 V (Ag/AgCl) | 2     | 250      | --     | --       | 270     | --           | 1-2, 2-4       | --   | --   | S31 |
| <b>Templated Porous Carbon by Hard and Soft Templating</b> |                                     |                          |       |          |        |          |         |              |                |      |      |     |
| MHCS                                                       | 2M H <sub>2</sub> SO <sub>4</sub>   | 0 to 1 V (Ag/AgCl)       | --    | --       | 0.25   | 404      | 935     | 2.14(0.45)   | (6.67)         | --   | --   | S32 |
| <b>Templated Porous Carbon by Nanocasting</b>              |                                     |                          |       |          |        |          |         |              |                |      |      |     |
| carbon hollow                                              |                                     |                          |       |          |        |          | 658     | 1.07         | <1, 1-2, (>50) | --   | --   |     |
| spheres                                                    | 6M KOH                              | -1 to 0 V (Hg/HgO)       | --    | --       | 1(0.5) | 266(269) |         |              |                |      |      | S33 |
| MPM-2                                                      | 6M KOH                              | 0 to -0.9 V (Hg/HgO)     | --    | --       | 0.1    | 224      | 349     | 0.339(0.051) | (3.88)         | --   | --   | S34 |
| ARP-CTs-30                                                 | 6M KOH                              | -1 to 0 V (Hg/HgO)       | 50    | 230      | --     | --       | 2415.68 | 1.55         | --             | --   | --   | S35 |
| BMC-I                                                      | 1M H <sub>2</sub> SO <sub>4</sub>   | 0 to 0.8 V (Hg/HgO)      | 2     | 112      | --     | --       | 660     | 0.54         | (4.9)          | --   | --   | S36 |
| BMC-II                                                     | 1M H <sub>2</sub> SO <sub>4</sub>   | 0 to 0.8 V (Hg/HgO)      | 2     | 99       | --     | --       | 470     | 0.49         | (6.8)          | --   | --   | S36 |



**Table S2. Specific capacitance results reported in the literature for representative carbon-based materials in 2-electrode cells.**

| Name                                               | Electrolyte                       | Potential Range | CV Measurement    |                             | GCD Measurement        |                             | Gas Sorption Measurement              |                                                                             |                                      |                                                          |                            | Reference |
|----------------------------------------------------|-----------------------------------|-----------------|-------------------|-----------------------------|------------------------|-----------------------------|---------------------------------------|-----------------------------------------------------------------------------|--------------------------------------|----------------------------------------------------------|----------------------------|-----------|
|                                                    |                                   |                 | Scan rate<br>mV/s | Specific Capacitance<br>F/g | Current Density<br>A/g | Specific Capacitance<br>F/g | BET Surface Area<br>m <sup>2</sup> /g | Pore Volume<br>V <sub>total</sub> (V <sub>mic</sub> )<br>cm <sup>3</sup> /g | Pore Size micropore (mesopore)<br>nm | CO <sub>2</sub> Adsorption<br>mmol/g(cm <sup>3</sup> /g) | Hydrogen adsorption<br>wt% |           |
| <b>Activated Carbon</b>                            |                                   |                 |                   |                             |                        |                             |                                       |                                                                             |                                      |                                                          |                            |           |
| PAN-A                                              | 1M H <sub>2</sub> SO <sub>4</sub> | 0 to 0.8 V      | 1(5)              | 201(176)                    | 0.1(0.5)               | 176(157)                    | 807                                   | --                                                                          | --                                   | --                                                       | --                         | S37       |
| aMP                                                | 2M H <sub>2</sub> SO <sub>4</sub> | -1 to 1 V       | --                | --                          | 0.125                  | 295                         | 3160                                  | 1.58                                                                        | 0.6-2, 2-4                           | --                                                       | --                         | S38       |
| KOH-A                                              | 1M H <sub>2</sub> SO <sub>4</sub> | 0 to 1 V        | --                | --                          | 0.1                    | 176±9                       | 2570                                  | 3                                                                           | --                                   | --                                                       | --                         | S39       |
| KOH-A                                              | 6M KOH                            | 0 to 1 V        | --                | --                          | 0.1                    | 173±7                       | 2570                                  | 3                                                                           | --                                   | --                                                       | --                         | S39       |
| H-CMN                                              | 1M H <sub>2</sub> SO <sub>4</sub> | 0 to 1 V        | --                | --                          | 0.1                    | 264                         | 2557.3                                | --                                                                          | <4                                   | --                                                       | --                         | S40       |
| SCC-750-1                                          | 1M H <sub>2</sub> SO <sub>4</sub> | 0 to 1 V        | --                | --                          | 0.25                   | 300                         | 1452                                  | 0.81(0.48)                                                                  | <2                                   | (0.27)                                                   | --                         | S41       |
| CGC                                                | 1M H <sub>2</sub> SO <sub>4</sub> | 0 to 1 V        | --                | --                          | 0.05                   | 368                         | 1019                                  | 0.48(0.21)                                                                  | <1, (2-4)                            | (~0.275)                                                 | --                         | S42       |
| AK3P-0.30                                          | 30wt% KOH                         | 0 to 0.8 V      | --                | --                          | 0.12                   | 218                         | 1759                                  | 0.93(0.61)                                                                  | (3.5-4.5)                            | --                                                       | --                         | S43       |
| NC-700-3                                           | 30wt% KOH                         | 0 to 1 V        | --                | --                          | 0.125                  | 311                         | 2509                                  | 1.34(1.12)                                                                  | (2.1)                                | --                                                       | --                         | S44       |
| <b>Carbide-derived Carbon</b>                      |                                   |                 |                   |                             |                        |                             |                                       |                                                                             |                                      |                                                          |                            |           |
| TiC-CDC                                            | 1M H <sub>2</sub> SO <sub>4</sub> | -0.5 to 0.5 V   | 5                 | 190                         | --                     | --                          | 600-2000                              | --                                                                          | 0.7-1.85                             | --                                                       | --                         | S45       |
| <b>Carbon Aerogel</b>                              |                                   |                 |                   |                             |                        |                             |                                       |                                                                             |                                      |                                                          |                            |           |
| ACA                                                | 6M KOH                            | -1 to 0 V       | --                | --                          | 1                      | 136                         | 1447                                  | --                                                                          | (3.4)                                | --                                                       | --                         | S46       |
| <b>Carbon Fiber-based Material</b>                 |                                   |                 |                   |                             |                        |                             |                                       |                                                                             |                                      |                                                          |                            |           |
| ACF4                                               | 6M KOH                            | 0 to 1 V        | 1                 | 371                         | --                     | --                          | 3291                                  | 2.162(0.721)                                                                | ~1.5, (~3)                           | --                                                       | --                         | S47       |
| <b>Activated Carbon Containing Graphene or CNT</b> |                                   |                 |                   |                             |                        |                             |                                       |                                                                             |                                      |                                                          |                            |           |
| CNAGs/SMF-Ni-5                                     | 5M KOH                            | -1 to 0 V       | 1(5)              | 359(321)                    | --                     | --                          | 155                                   | 0.138(0.05)                                                                 | (3.6)                                | --                                                       | --                         | S48       |
| hGO                                                | 6M KOH                            | 0 to 1 V        | 10                | 110                         | --                     | --                          | --                                    | --                                                                          | --                                   | --                                                       | --                         | S49       |
| GAC                                                | KOH                               | 0 to 1.2 V      | --                | --                          | 0.1                    | 122                         | 798                                   | --                                                                          | 2                                    | --                                                       | --                         | S50       |
| <b>Hiearchically Porous Carbon</b>                 |                                   |                 |                   |                             |                        |                             |                                       |                                                                             |                                      |                                                          |                            |           |
| HPCs-3                                             | 6M KOH                            | 0 to 1 V        | 1                 | 272                         | --                     | --                          | 689                                   | 0.61(0.19)                                                                  | (3.84)                               | --                                                       | --                         | S51       |
| <b>MOF-derived Carbon</b>                          |                                   |                 |                   |                             |                        |                             |                                       |                                                                             |                                      |                                                          |                            |           |
| C1000                                              | 1M H <sub>2</sub> SO <sub>4</sub> | -0.5 to 0.5 V   | 5                 | 161                         | --                     | --                          | 3405                                  | 2.58(1.54)                                                                  | --                                   | --                                                       | 2.77                       | S52       |
| C800                                               | 1M H <sub>2</sub> SO <sub>4</sub> | -0.5 to 0.5 V   | 5                 | 188                         | --                     | --                          | 2169                                  | 1.5(0.9)                                                                    | --                                   | --                                                       | 2.23                       | S52       |
| NPC                                                | 1M H <sub>2</sub> SO <sub>4</sub> | -0.5 to 0.5 V   | 5                 | 204                         | --                     | --                          | 2872                                  | 2.06                                                                        | --                                   | --                                                       | 2.6                        | S53       |
| NPC650                                             | 1M H <sub>2</sub> SO <sub>4</sub> | -0.5 to 0.5 V   | 5                 | 167                         | --                     | --                          | 1521                                  | 1.48(0.06)                                                                  | (3.9)                                | --                                                       | --                         | S54       |
| <b>Templated Porous Carbon by Nanocasting</b>      |                                   |                 |                   |                             |                        |                             |                                       |                                                                             |                                      |                                                          |                            |           |
| OMC-M-6                                            | 30wt% KOH                         | -1 to -0.2 V    | 5                 | 205.3                       | --                     | --                          | 868.5                                 | 1.75(0.18)                                                                  | (8.5)                                | --                                                       | --                         | S55       |
| CNC700                                             | 1M H <sub>2</sub> SO <sub>4</sub> | 0 to 1 V        | 10                | 251                         | --                     | --                          | 1854                                  | --                                                                          | (5-8)                                | --                                                       | --                         | S56       |
| HPC-242                                            | 1M H <sub>2</sub> SO <sub>4</sub> | -0.2 to 0.8 V   | --                | --                          | 0.1                    | 165                         | 940                                   | 1.2(0.33)                                                                   | 242*                                 | --                                                       | --                         | S57       |
| Y-Ac                                               | 1M H <sub>2</sub> SO <sub>4</sub> | 0 to 1 V        | 2                 | 240                         | --                     | --                          | 1814                                  | 1.03(0.508)                                                                 | <0.7, 1.7                            | --                                                       | --                         | S58       |
| Y-AN                                               | 1M H <sub>2</sub> SO <sub>4</sub> | 0 to 1 V        | 2                 | 340                         | --                     | --                          | 1680                                  | 0.86(0.51)                                                                  | <0.7, 1.7                            | --                                                       | --                         | S58       |

\*macroporous

## References

- S1. H. Kim, M. E. Fortunato, H. Xu, J. H. Bang and K. S. Suslick, *J. Phys. Chem. C*, 2011, **115**, 20481–20486.
- S2. S.-J. Han, Y.-H. Kim, K.-S. Kim and S.-J. Park, *Curr. Appl Phys.*, 2012, **12**, 1039–1044.
- S3. A. Elmouwahidi, Z. Zapata-Benabithé, F. Carrasco-Marín and C. Moreno-Castilla, *Bioresource Technol.*, 2012, **111**, 185–190.
- S4. J. W. Lim, E. Jeong, M. J. Jung, S. I. Lee and Y.-S. Lee, *J. Ind. Eng. Chem.*, 2012, **18**, 116–122.
- S5. R.-L. Tseng, S.-K. Tseng, F.-C. Wu, C.-C. Hu and C.-C. Wang, *J. Chin. Inst. Chem. Eng.*, 2008, **39**, 37–47.
- S6. D. Yuan, J. Chen, J. Zeng and S. Tan, *Electrochem. Commun.*, 2008, **10**, 1067–1070.
- S7. S.-E. Chun, J. F. Whitacre, *Electrochim. Acta*, 2012, **60**, 392–400.
- S8. C.R. Pérez, S.-H. Yeon, J. Ségalini, V. Presser, P.-L. Taberna, P. Simon and Y. Gogotsi, *Adv. Funct. Mater.*, 2013, **23**, 1081–1089.
- S9. H. Wu, X. Wang, X. Wang, X. Zhang, L. Jiang, B. Hu and Y. Wang, *J. Solid State Electrochem.*, 2012, **16**, 2941–2947.
- S10. Y. J. Lee, H. W. Park, U. G. Hong and I. K. Song, *Curr. Appl. Phys.*, 2012, **12**, 1074–1080.
- S11. C. Ma, Y. Song, J. Shi, D. Zhang, M. Zhong, Q. Guo and L. Liu, *Mater. Lett.*, 2012, **76**, 211–214.
- S12. L-F. Chen, X-D. Zhang, H-W. Liang, M. Kong, Q-F. Guan, P. Chen, Z-Y. Wu and S-H. Yu, *ACS NANO*, 2012, **6(8)**, 7092–7102.
- S13. C. Zheng, W. Qian and F. Wei, *Mater. Sci. Eng., B*, 2012, **177**, 1138–1143.
- S14. J. Zhang and J.W. Lee, *ACS Sustainable Chem. Eng.*, 2014, **2(4)**, 735–740.
- S15. L. Sun, L. Wang, C. Tian, T. Tan, Y. Xie, K. Shi, M. Li and H. Fu, *RSC Adv.*, 2012, **2**, 4498–4506.
- S16. M-X. Wang, Q. Liu, H-F. Sun, E. A. Stach, H. Zhang, L. Stanciu and J. Xie, *Carbon*, 2012, **50**, 3845–3853.
- S17. K. Zhang, B. T. Ang, L. L. Zhang, X. S. Zhao and J. Wu, *J. Mater. Chem.*, 2011, **21**, 2663–2670.
- S18. H. Sun, L. Cao and L. Lu, *Energy Environ. Sci.*, 2012, **5**, 6206–6213.
- S19. L. Qie, W. Chen, H. Xu, X. Xiong, Y. Jiang, F. Zou, X. Hu, Y. Xin, Z. Zhang and Y. Huang,

- Energy Environ. Sci.*, 2013, **6**, 2497–2504.
- S20. J. Jin, S. Tanaka, Y. Egashira and N. Nishiyama, *Carbon*, 2012, **48**, 1985–1989.
- S21. X. Wang, J.S. Lee, C. Tsouris, D. W. DePaoli and S. Dai, *J. Mater. Chem.*, 2010, **20**, 4602–4608.
- S22. H. Zhu, J. Yin, X. Wang, H. Wang and X. Yang, *Adv. Funct. Mater.*, 2013, **23**, 1305–1312.
- S23. N. L. Torad, R. R. Salunkhe, Y. Li, H. Hamoudi, M. Imura, Y. Sakka, C.-C. Hu and Y. Yamauchi, *Chem. Eur. J.*, 2014, **20**, 7895–7900.
- S24. Q. Wang, W. Xia, W. Guo, L. An, D. Xia and R. Zou, *Chem. Asian J.*, 2013, **8**, 1879–1885.
- S25. P. Su, L. Jiang, J. Zhao, J. Yan, C. Li and Q. Yang, *Chem. Commun.*, 2012, **48**, 8769–8771.
- S26. W. Chaikittisilp, M. Hu, H. Wang, H-S. Huang, T. Fujita, K. C.-W. Wu, L-C. Chen, Y. Yamauchi and K. Ariga, *Chem. Commun.*, 2012, **48**, 7259–7261.
- S27. Z. J. Zhang, P. Cui, C. Chen, X. Y. Chen, and J. W. Liu, *J. Solid State Electrochem.*, 2014, **18**, 59–67.
- S28. J. Hu, H. Wang, Q. Gao and H. Guo, *Carbon*, 2010, **48**, 3599–3606.
- S29. Y. Lv, F. Zhang, Y. Dou, Y. Zhai, J. Wang, H. Liu, Y. Xia, B. Tu and D. Zhao, *J. Mater. Chem.*, 2012, **22**, 93–99.
- S30. D. Zhang, L. Zheng, Y. Ma, L. Lei, Q. Li, Y. Li, H. Luo, H. Feng and Y. Hao, *ACS Appl. Mater. Interfaces* 2014, **6**, 2657–2665.
- S31. G. Pognon, C. Cougnon, D. Mayilukila and D. Bélanger, *ACS Appl. Mater. Interfaces*, 2012, **4**, 3788–3796.
- S32. Y. Wang, S. Tao and Y. An, *Microporous Mesoporous Mater.*, 2012, **163**, 249–258.
- S33. Y. Han, X. Dong, C. Zhang and S. Liu, *J. Power Sources*, 2012, **211**, 92–96.
- S34. C. Ma, J. Shi, Y. Song, D. Zhang, X. Zhai, M. Zhong, Q. Guo and L. Liu, *Int. J. Electrochem. Sci.*, 2012, **7**, 7587–7599.
- S35. Y. Chen, B. Wang, S. Dong, Y. Wang and Y. Liu, *Electrochim. Acta*, 2012, **80**, 34–40.
- S36. D-W. Wang, F. Li, Z.-G. Chen, G. Q. Lu and H-M. Cheng, *Chem. Mater.*, 2008, **20**, 7195–7200.
- S37. G. Lota, B. Grzyb, H. Machnikowska, J. Machnikowski and E. Frackowiak, *Chem. Phys. Lett.*, 2005, **404**, 53–58.
- S38. C-W. Huang, C-T. Hsieh, P-L. Kuo and H. Teng, *J. Mater. Chem.*, 2012, **22**, 7314–7322.

- S39. M. Zhong, E. K. Kim, J. P. McGann, S-E. Chun, J. F. Whitacre, M. Jaroniec, K. Matyjaszewski and T. Kowalewski, *J. Am. Chem. Soc.* 2012, **134**, 14846–14857.
- S40. Y. S. Yun, S. Y. Cho, J. Shim, B. H. Kim, S-J. Chang, S. J. Baek, Y. S. Huh, Y. Tak, Y. W. Park, S. Park and H.-J. Jin, *Adv. Mater.*, 2013, **25**, 1993–1998.
- S41. T.E. Rufford, D. Hulicova-Jurcakova, K. Khosla, Z. Zhu and G.Q. Lu, *J. Power Sources*, 2010, **195**, 912–918.
- S42. T.E. Rufford, D. Hulicova-Jurcakova, Z. Zhu and G.Q. Lu, *Electrochem Commun.*, 2008, **10**, 1594–1597.
- S43. S. Guo, F. Wang, H. Chen, H. Ren, R. Wang and X. Pan, *J. Solid State Electrochem.*, 2012, **16**, 3355–3362.
- S44. X. Li, W. Xinga, S. Zhuoa, J. Zhoua, F. Li, S-Z Qiao and G-Q. Lu, *Bioresource Technol.*, 2011, **102**, 1118–1123.
- S45. J. Chmiola, G. Yushin, R. Dash and Y. Gogotsi, *J. Power Sources*, 2006, **158**, 765–772.
- S46. Y.J. Lee, H.W. Park, S. Park and I.K. Song, *Curr. Appl Phys.*, 2012, **12**, 233–237.
- S47. B. Xu, F. Wu, R. Chen, G. Cao, S. Chen, Z. Zhou and Y. Yang, *Electrochem. Comm.*, 2008, **10**, 795–797.
- S48. Y. Fang, F. Jiang, H. Liu, X. Wu and Yong Lu, *RSC Adv.*, 2012, **2**, 6562–6569.
- S49. S. Zhang and N. Pan, *J. Mater. Chem. A*, 2013, **1**, 7957.
- S50. Y. Chen, X. Zhang, H. Zhang, X. Sun, D. Zhang and Y. Ma, *RSC Adv.*, 2012, **2**, 7747–7753.
- S51. X. Zhang, X. Wang, J. Su, X. Wang, L. Jiang, H. Wu and C. Wu, *J. Power Sources*, 2012, **199**, 402–408.
- S52. H-L. Jiang, B. Liu, Y-Q. Lan, K. Kuratani, T. Akita, H. Shioyama, F. Zong and Q. Xu, *J. Am. Chem. Soc.*, 2011, **133**, 11854–11857.
- S53. B. Liu, H. Shioyama, T. Akita and Q. Xu, *J. Am. Chem. Soc.* 2008, **130**, 5390–5391.
- S54. B. Liu, H. Shioyama, H. Jiang, X. Zhang and Q. Xu, *Carbon*, 2010, **48**, 456–463.
- S55. H. Lu, W. Dai, M. Zheng, N. Li, G. Ji and J. Cao, *J. Power Sources*, 2012, **209**, 243–250.
- S56. K. Xie, X. Qin, X. Wang, Y. Wang, H. Tao, Q. Wu, L. Yang and Z. Hu, *Adv. Mater.*, 2012, **24**, 347–352.
- S57. Q. Cheng, Y. Xia, V. Pavlinek, Y. Yan, C. Li and P. Saha, *J. Mater. Sci.*, 2012, **47**, 6444–6450.
- S58. C.O. Ania, V. Khomeiko, E. Raymundo-Piñero, J.B. Parra and F. Béguin, *Adv. Funct.*

*Mater.*, 2007, **17**, 1828–1836.
